# Supplementary material
Source: PubMed Central journal article supplement (PMC3094553)
Supplement: NIHMS293392-supplement-1.pdf [file NIHMS293392-supplement-1.pdf]

Supplementary Figure 1

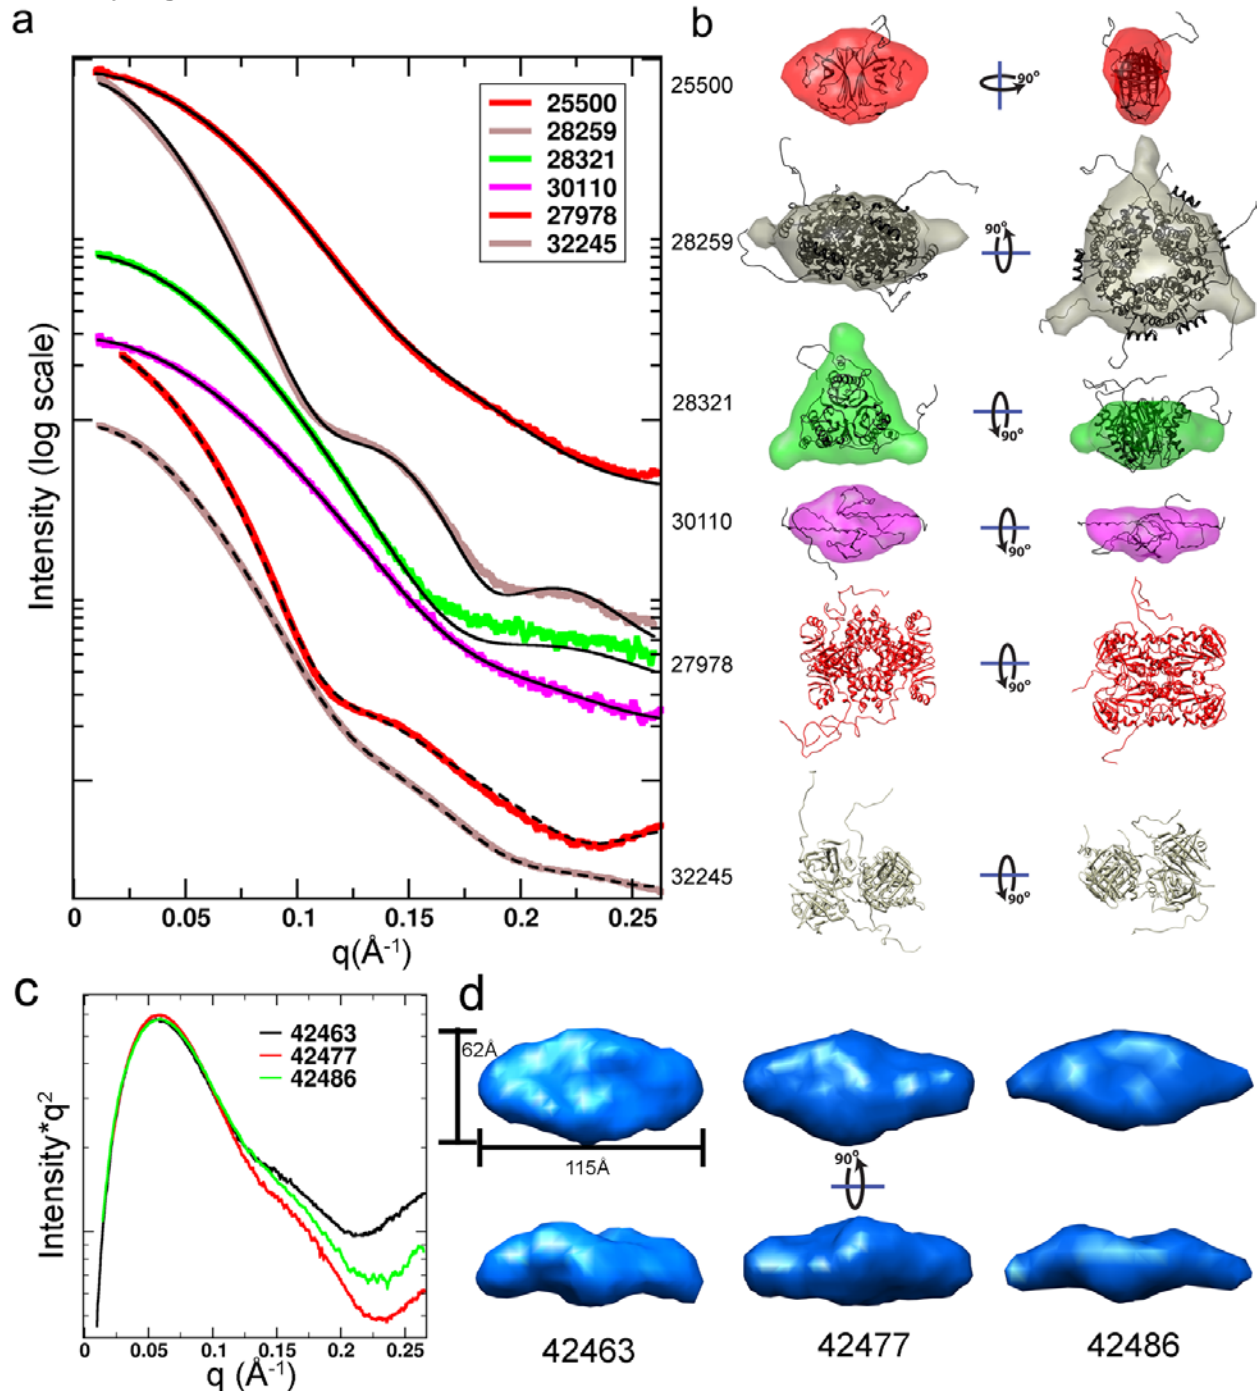

**Supplementary Figure 1** SAXS shape and assembly for monodispersed targets from JCSG. (a) For the six proteins with existing structures, the experimental scattering data (colors) were compared with the scattering curve calculated from models based on existing structure (black). The structures were modified to include the His-tags. Conformation space for these His-tags were sampled as described in Pelikan et al.<sup>1</sup> and the single best fit conformation is shown. (b) The envelope determinations (colored as in a) were overlaid with the molded structures (ribbons). For two cases (27978 and 32245) envelopes do not agree in detail with the suggested atomic models. In both cases the flexible regions make up ~15% of the structure. (c) For the 3 proteins with no pre-existing structural information, the Kratky plot is shown. The similarities in the smallest  $q$  region suggest the proteins have structural similarities while the wider  $q$  decay identifies the most compact form as 42477. (d) GASBOR envelopes are shown for each structure modeled with 2-fold symmetry.

## Supplementary Figure 2

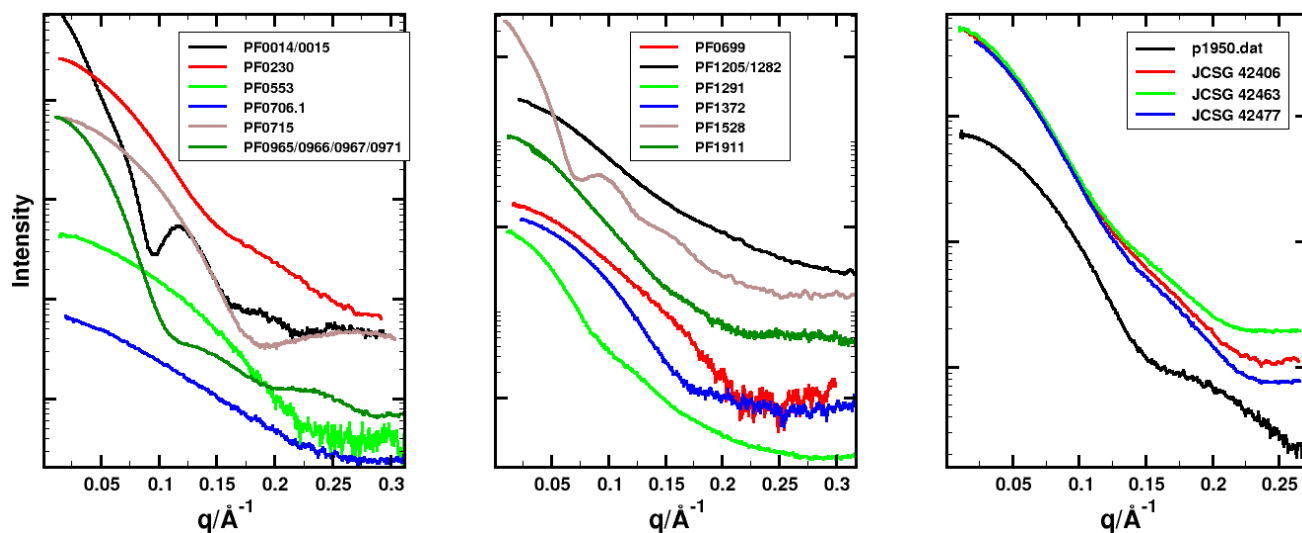

**Supplementary Figure 2** Scattering profiles of *Pfu* and JCSG samples not shown in main text or above. All SAXS data on each protein will be made available at [www.bioisis.net](http://www.bioisis.net)

## Supplementary Figure 3

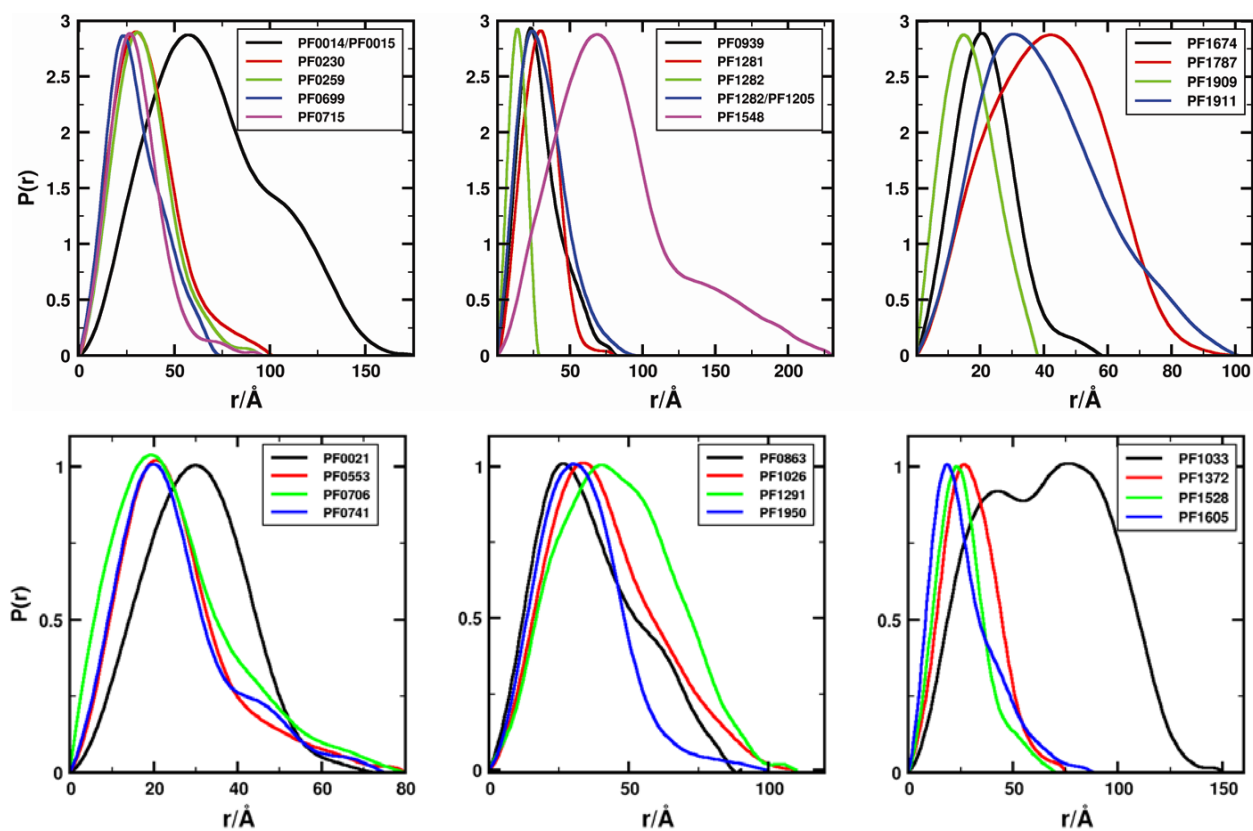

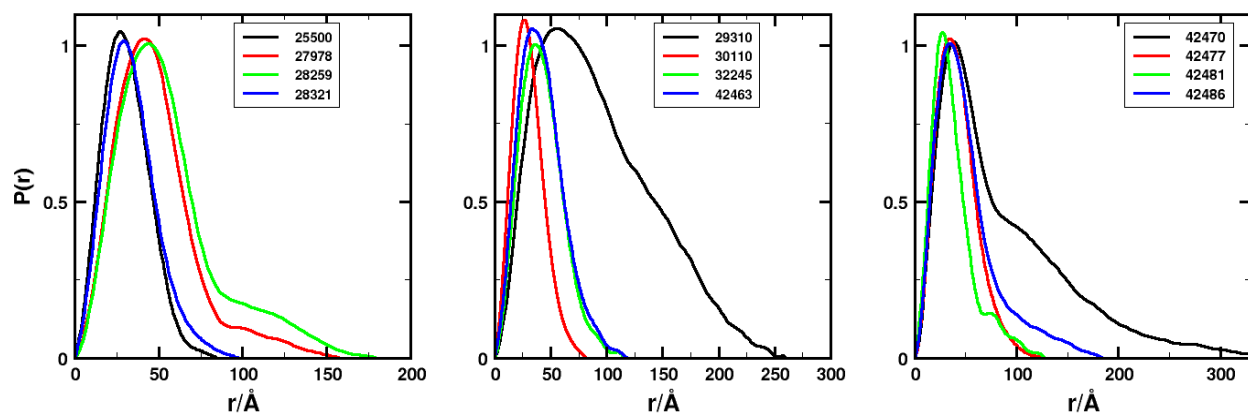

**Supplementary Figure 3** Pair distribution  $P(r)$  functions for *Pfu* and JCSG samples. Pair distribution functions are determined using a Perl script for GNOM which automatically runs GNOM over many guesses of maximum dimensions ( $D_{max}$ ). The most appropriate  $D_{max}$  has the following properties: the smallest value required to fit the data, smoothly approaches  $P(r)=0$ , and where a plot of  $R_g$  vs guessed  $D_{max}$  starts to plateau. The pair distribution function is accessible within 30 seconds of data collection and contains significant structural information. For example the ring like structure of PF1033 is readily apparent from its  $P(r)$  function.

**Supplementary Table 1** SAXS characterizations for sixteen JCSG samples including determined structural information.

| Sample                     |         |           | New Structural Results |           |                                                             |              |
|----------------------------|---------|-----------|------------------------|-----------|-------------------------------------------------------------|--------------|
| Class                      | JCSG ID | Topsan ID | $R_g$                  | $D_{max}$ | Assemblies                                                  | 3-D-Envelope |
| Aggregates                 | 25287   | 366924    |                        |           | Inseparable                                                 | No           |
|                            | 32541   | 375605    |                        |           | Separable                                                   | No           |
|                            | 42470   | 390709    |                        |           | Separable                                                   | No           |
|                            | 42482   | 390764    |                        |           | Separable                                                   | No           |
| Mixtures                   | 29310   | 372359    |                        |           | Large assembly with concentration dependent multimerization | No           |
|                            | 31314*  | 374450    |                        |           | Mostly 2-mer                                                | No           |
|                            | 42481*  | 390756    |                        |           | Small multimers < 4mer                                      | Yes          |
| Matching Crystal Structure | 25500   | 370637    | 24.0                   | 85        | Matching 2-mer                                              | Yes          |
|                            | 27978   | 371321    | 35.0                   | 158       | Mostly 4-mer                                                | Yes          |
|                            | 28259   | 371529    | 44.6                   | 180       | Matching 6-mer                                              | Yes          |
|                            | 28321*  | 371708    | 26.3                   | 98        | Matching 3-mer                                              | Yes          |
|                            | 30110*  | 371811    | 23.5                   | 82        | Matching 2-mer                                              | Yes          |
|                            | 32245   | 375018    | 32.6                   | 116       | Matching 2-mer                                              | Yes          |
| Novel Structures           | 42463*  | 390716    | 32.8                   | 120       | 2-mer                                                       | Yes          |
|                            | 42470*  | 390709    | 32.4                   | 125       | 2-mer                                                       | Yes          |
|                            | 42486   | 390749    | 42.3                   | 185       | 2-mer                                                       | Yes          |

\*indicates samples which were initially aggregates and were aided by centrifuge filtration prior to SAXS experiments.

JCSG ID refers to an internal identification tag. The Topsan ID (The Open Protein Structure Identification Network) catalogs detailed target information at <http://www.topsan.org/>.

**Supplementary Table 2** Comparison of radius of gyration ( $R_G$ ) using two methods and mass based on Porod volume

| ORF           | $R_G$ (Gunier)<br>(Å) | $R_G$ (from P(r)<br>in (Å)) | Mass from<br>Porod Volume<br>(kDa) | Mass from Porod<br>Volume/monomeric<br>mass |
|---------------|-----------------------|-----------------------------|------------------------------------|---------------------------------------------|
| PF0014/PF0015 | 55.0                  | 54.1                        | 370                                | Unknown stoichiometry                       |
| PF0380        | 21                    | 21.6                        | 20.6                               | 0.72                                        |
| PF0699        | 23.7                  | 23.3                        | 25                                 | 2.1                                         |
| PF0715        | 23.1                  | 23.5                        | 45                                 | 2.3                                         |
| PF1282/PF1205 | 24.3                  | 25.1                        | 20                                 | 1.2                                         |
| PF1281        | 22.1                  | 22.1                        | 44                                 | 3.1                                         |
| PF1282        | 11.0                  | 10.7                        | 3                                  | 0.5                                         |
| PF1674        | 16.7                  | 16.88                       | 15                                 | 0.8                                         |
| PF1787        | 33.9                  | 33.9                        | 80                                 | 2.9                                         |
| PF1911        | 30.9                  | 31.3                        | 60                                 | 1.8                                         |
| PF2047.1      | 29.7                  | 32                          | 28                                 | 3.0                                         |

| ORF                       | $R_G$ (Gunier)<br>(Å) | $R_G$ (from<br>P(r) in<br>(Å)) | Mass from Porod<br>Volume (kDa) | Mass<br>from<br>I(0)/c | Mass from Porod<br>Volume/monomeric<br>mass |
|---------------------------|-----------------------|--------------------------------|---------------------------------|------------------------|---------------------------------------------|
| PF0094                    | 28                    | 34.6                           | 40                              | 42                     | 1.6                                         |
| PF0553                    | 19.2                  | 20.37                          | 15                              | 21                     | 0.75                                        |
| PF0706.1                  | 18.6                  | 20.74                          | 6                               | 6                      | 1.1                                         |
| PF0741                    | 20                    | 20.24                          | 12                              | 15                     | 1.1                                         |
| PF0863                    | 27.4                  | 28.7                           | 35                              | 39                     | 1.95                                        |
| PF0965/0966/<br>0967/0971 | 36.9                  | 37.3                           | 170                             | 234                    |                                             |
| PF1026                    | 31.8                  | 32.32                          | 72                              | 70                     | 1.45                                        |
| PF1033                    | 51.2                  | 50.8                           | 180                             | 185                    | 7.1                                         |
| PF1061                    | 17.7                  | 16.3                           | 8                               | 9                      | 1                                           |
| PF1291                    | 35.6                  | 35.4                           | 120                             | 110                    | 3.6                                         |
| PF1372                    | 23                    | 23.2                           | 33                              | 37                     | 3.7                                         |
| PF1528                    | 19.9                  | 20.2                           | 22                              | 18                     | 0.8                                         |
| PF1605                    | 21                    | 22.0                           | 10                              | 13                     | 1.3                                         |
| PF1950                    | 25.3                  | 25.9                           | 45                              | 62                     | 2.3                                         |

**Supplementary Table 2** Global parameters for monodispersed samples.  $R_G$  (Gunier) is the radius of gyration extracted from Gunier analysis, while  $R_G$  (P(r)) is that extracted from the pair distribution function P(r). The mass from the Porod volume is extracted using a rule of thumb of 0.5 times the Porod Volume. The Porod volume was extracted using Porod button in the PRIMUS program.

1. Pelikan, M., Hura, G.L., & Hammel, M. Structure and flexibility with proteins as identified through small angle x-ray scattering. *General Physiology and Biophysics* (in press June 2009).
